# Supplementary material
Source: MDPI journal article supplement (https://www.mdpi.com/2039-4403/13/2/68)
Supplement: s1 [file s1]

**Supplementary File S1: Table: Revised Standards for Quality Improvement Reporting Excellence (SQUIRE 2.0)**

| Text Section and Item Name             | Section or Item Description                                                                                                                                                                                                                                                                           | Page(s) of the manuscript |
|----------------------------------------|-------------------------------------------------------------------------------------------------------------------------------------------------------------------------------------------------------------------------------------------------------------------------------------------------------|---------------------------|
| <b>Title and Abstract</b>              |                                                                                                                                                                                                                                                                                                       |                           |
| <b>1. Title</b>                        | Indicate that the manuscript concerns an initiative to improve healthcare (broadly defined to include the quality, safety, effectiveness, patient- centeredness, timeliness, cost, efficiency, and equity of healthcare)                                                                              | <b>1</b>                  |
| <b>2. Abstract</b>                     | a. Provide adequate information to aid in searching and indexing<br>b. Summarize all key information from various sections of the text using the abstract format of the intended publication or a structured summary such as: background, local problem, methods, interventions, results, conclusions | <b>1</b>                  |
| <b>Introduction</b>                    | <i>Why did you start?</i>                                                                                                                                                                                                                                                                             |                           |
| <b>3. Problem Description</b>          | Nature and significance of the local problem                                                                                                                                                                                                                                                          | <b>2; 3</b>               |
| <b>4. Available knowledge</b>          | Summary of what is currently known about the problem, including relevant previous studies                                                                                                                                                                                                             | <b>2; 3</b>               |
| <b>5. Rationale</b>                    | Informal or formal frameworks, models, concepts, and/or theories used to explain the problem, any reasons or assumptions that were used to develop the intervention(s), and reasons why the intervention(s) was expected to work                                                                      | <b>2; 3</b>               |
| <b>6. Specific aims</b>                | Purpose of the project and of this report                                                                                                                                                                                                                                                             | <b>3</b>                  |
| <b>Methods</b>                         | <i>What did you do?</i>                                                                                                                                                                                                                                                                               |                           |
| <b>7. Context</b>                      | Contextual elements considered important at the outset of introducing the intervention(s)                                                                                                                                                                                                             | <b>3</b>                  |
| <b>8. Intervention(s)</b>              | a. Description of the intervention(s) in sufficient detail that others could reproduce it<br>b. Specifics of the team involved in the work                                                                                                                                                            | <b>4; 5</b>               |
| <b>9. Study of the Intervention(s)</b> | a. Approach chosen for assessing the impact of the intervention(s)<br>b. Approach used to establish whether the observed outcomes were due to the intervention(s)                                                                                                                                     | <b>5-7</b>                |

|                                   |                                                                                                                                                                                                                                                                                                                                                                                                                                                                                                                                                                                                                                                             |                |
|-----------------------------------|-------------------------------------------------------------------------------------------------------------------------------------------------------------------------------------------------------------------------------------------------------------------------------------------------------------------------------------------------------------------------------------------------------------------------------------------------------------------------------------------------------------------------------------------------------------------------------------------------------------------------------------------------------------|----------------|
| <b>10. Measures</b>               | <ul style="list-style-type: none"> <li>a. Measures chosen for studying processes and outcomes of the intervention(s), including rationale for choosing them, their operational definitions, and their validity and reliability</li> <li>b. Description of the approach to the ongoing assessment of contextual elements that contributed to the success, failure, efficiency, and cost</li> <li>c. Methods employed for assessing completeness and accuracy of data</li> </ul>                                                                                                                                                                              | <b>6; 7</b>    |
| <b>11. Analysis</b>               | <ul style="list-style-type: none"> <li>a. Qualitative and quantitative methods used to draw inferences from the data</li> <li>b. Methods for understanding variation within the data, including the effects of time as a variable</li> </ul>                                                                                                                                                                                                                                                                                                                                                                                                                | <b>6; 7</b>    |
| <b>12. Ethical Considerations</b> | Ethical aspects of implementing and studying the intervention(s) and how they were addressed, including, but not limited to, formal ethics review and potential conflict(s) of interest                                                                                                                                                                                                                                                                                                                                                                                                                                                                     | <b>3</b>       |
| <b>Results</b>                    | <i>What did you find?</i>                                                                                                                                                                                                                                                                                                                                                                                                                                                                                                                                                                                                                                   |                |
| <b>13. Results</b>                | <ul style="list-style-type: none"> <li>a. Initial steps of the intervention(s) and their evolution over time (e.g., time-line diagram, flow chart, or table), including modifications made to the intervention during the project</li> <li>b. Details of the process measures and outcome</li> <li>c. Contextual elements that interacted with the intervention(s)</li> <li>d. Observed associations between outcomes, interventions, and relevant contextual elements</li> <li>e. Unintended consequences such as unexpected benefits, problems, failures, or costs associated with the intervention(s).</li> <li>f. Details about missing data</li> </ul> | <b>7; 8; 9</b> |
| <b>Discussion</b>                 | <i>What does it mean?</i>                                                                                                                                                                                                                                                                                                                                                                                                                                                                                                                                                                                                                                   |                |
| <b>14. Summary</b>                | <ul style="list-style-type: none"> <li>a. Key findings, including relevance to the rationale and specific aims</li> <li>b. Particular strengths of the project</li> </ul>                                                                                                                                                                                                                                                                                                                                                                                                                                                                                   | <b>9</b>       |

|                           |                                                                                                                                                                                                                                                                                                                                                                                                                                                           |                  |
|---------------------------|-----------------------------------------------------------------------------------------------------------------------------------------------------------------------------------------------------------------------------------------------------------------------------------------------------------------------------------------------------------------------------------------------------------------------------------------------------------|------------------|
| <b>15. Interpretation</b> | <ul style="list-style-type: none"> <li>a. Nature of the association between the intervention(s) and the outcomes</li> <li>b. Comparison of results with findings from other publications</li> <li>c. Impact of the project on people and systems</li> <li>d. Reasons for any differences between observed and anticipated outcomes, including the influence of context</li> <li>e. Costs and strategic trade-offs, including opportunity costs</li> </ul> | <b>9; 10; 11</b> |
| <b>16. Limitations</b>    | <ul style="list-style-type: none"> <li>a. Limits to the generalizability of the work</li> <li>b. Factors that might have limited internal validity such as confounding, bias, or imprecision in the design, methods, measurement, or analysis</li> <li>c. Efforts made to minimize and adjust for limitations</li> </ul>                                                                                                                                  | <b>11</b>        |
| <b>17. Conclusions</b>    | <ul style="list-style-type: none"> <li>a. Usefulness of the work</li> <li>b. Sustainability</li> <li>c. Potential for spread to other contexts</li> <li>d. Implications for practice and for further study in the field</li> <li>e. Suggested next steps</li> </ul>                                                                                                                                                                                       | <b>12</b>        |
| <b>Other information</b>  |                                                                                                                                                                                                                                                                                                                                                                                                                                                           |                  |
| <b>18. Funding</b>        | Sources of funding that supported this work. Role, if any, of the funding organization in the design, implementation, interpretation, and reporting                                                                                                                                                                                                                                                                                                       | <b>12</b>        |
